# Supplementary material
Source: PubMed Central journal article supplement (PMC3173795)
Supplement: emboj2011271s1.pdf [file emboj2011271s1.pdf]

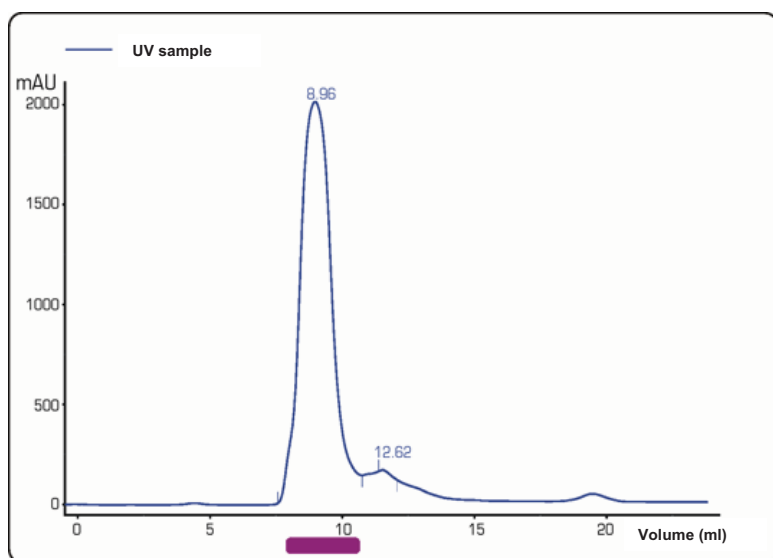

A)

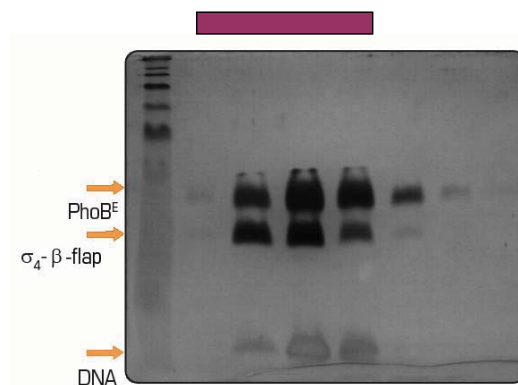

B)

Suppl. Fig. 1

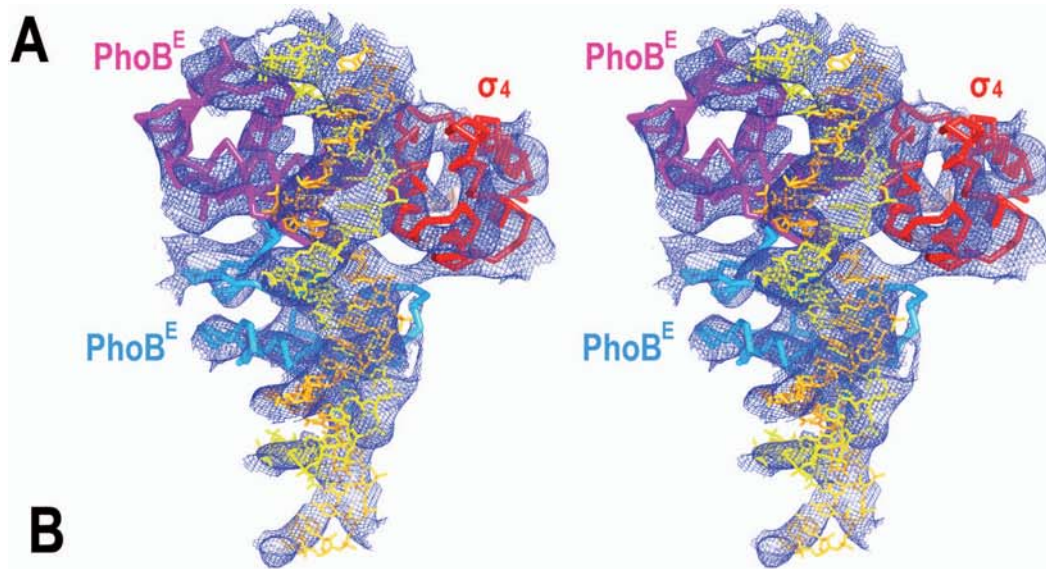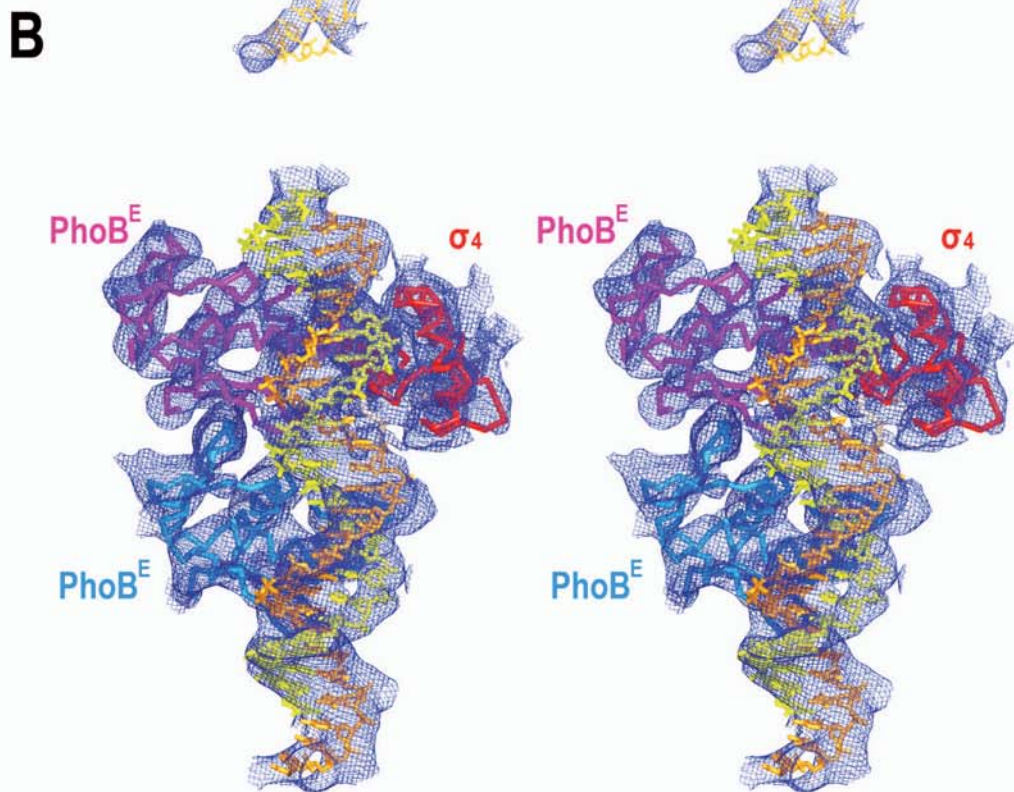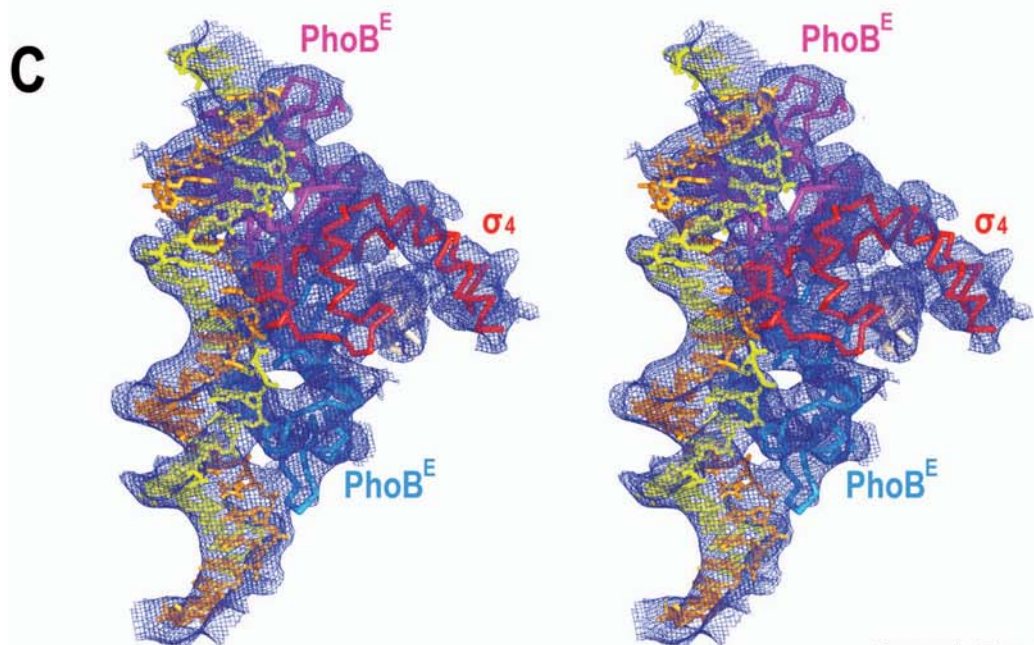

## Supplementary Figure legends

**Supplementary Figure 1: Preparation of the ternary complex.** A) Size-exclusion chromatography elution profile of the  $\sigma_4$ - $\beta$ -flap tip helix/PhoB<sup>E</sup>/*pho box* DNA ternary complex. B) SDS-PAGE of the fractions corresponding to the main peak in (A) (violet bar). The two proteins (PhoB<sup>E</sup> and  $\sigma_4$ - $\beta$ -flap tip helix chimera) and the 26-mer DNA oligonucleotide are present in the complex.

**Supplementary Figure 2: Electron density maps of the  $\sigma_4$ - $\beta$ -flap/PhoB<sup>E</sup>/*pho box* DNA complex.** A) Experimental  $\sigma_A$ -weighted electron density map of the ternary complex at 4.3 Å after density modification and phase extension, contoured at 1 $\sigma$ . The final model is shown fitted in the density. B) and C)  $\sigma_A$ -weighted electron density map of the ternary complex at 4.3 Å after rigid body refinement of the different components of the complex.
